# Supplementary material
Source: publisher figshare collection journal article supplement (https://frontiersin.figshare.com/ndownloader/files/25321553)
Supplement: Supplementary file 1 [file 25321553]

Supplementary Table 4. General Variance-Inflation Factor results to test the multicollinearity of the variables to standardize the CPUE of *I. fuscus*. In gray variables eliminated due GVIF > 3. Although the variable year had a high GVIF value, it was not eliminated because it is indispensable for producing the standardized CPUE annual series.

| **Variables** | **Test 1** | | | **Test 2** | | | **Test 3** | | | **Test 4** | | |
| --- | --- | --- | --- | --- | --- | --- | --- | --- | --- | --- | --- | --- |
| **GVIF** | **Df** | **GVIF*(1/(2*Df)*** | **GVIF** | **Df** | **GVIF*(1/(2*Df)*** | **GVIF** | **Df** | **GVIF*(1/(2*Df)*** | **GVIF** | **Df** | **GVIF*(1/(2*Df)*** |
| Year | 4866.7 | 8 | 1.70 | 18.2 | 8 | 1.2 | 1.7 | 8 | 1.03 | 1.5 | 8 | 1.03 |
| Arrival port | 6.0 | 4 | 1.25 | 5.0 | 4 | 1.2 | 4.7 | 4 | 1.21 | Eliminated | | |
| Month | 12.7 | 7 | 1.20 | 12.4 | 7 | 1.2 | Eliminated | | | | | |
| Towed | 1.5 | 1 | 1.22 | 1.5 | 1 | 1.2 | 1.4 | 1 | 1.2 | 1.3 | 1 | 1.13 |
| Bioregion | 5.1 | 2 | 1.50 | 4.7 | 2 | 1.5 | 4.6 | 2 | 1.46 | 1.3 | 2 | 1.07 |
| Fishing depth | 1.3 | 1 | 1.15 | 1.3 | 1 | 1.1 | 1.3 | 1 | 1.14 | 1.2 | 1 | 1.12 |
| Vessel type | 729.8 | 5 | 1.93 | Eliminated | | | | | | | | |
